# Supplementary material for: Heterologous expression of a Glyoxalase I gene from sugarcane confers tolerance to several environmental stresses in bacteria
Source: PeerJ. 2018 Oct 31;6:e5873. doi: 10.7717/peerj.5873 (PMC6215438; doi:10.7717/peerj.5873)
Supplement: Data S1 [file peerj-06-5873-s006.xlsx]

## Sheet: Raw data for figure 4
Fig.4 Growth of control pET 32a and pET 32a-ScGlo I-expressing E. coli Rosetta cells in LB liquid medium with 250 mM NaCl, 750 μM CuCl2, 750 μM CdCl2 or with 750 μM ZnSO4.
250 mM NaCl
	Time point (h)	Mean growth of pET 32a cells (OD600)	SE	Mean growth of pET 32a-ScGlo I-expressing cells (OD600)	SE
	0	0.0316	0.0009	0.0388	0.0036
	2	0.0659	0.0032	0.10635	0.0022
	4	0.131	0.0028	0.28195	0.0029
	6	0.3019	0.0158	0.75815	0.0253
	8	0.7526	0.0217	1.16525	0.0451
	10	1.00285	0.0264	1.25885	0.0232
	12	1.2124	0.0266	1.4042	0.0394
	14	1.33485	0.0523	1.5171	0.0416
	16	1.4082	0.0322	1.61065	0.0373
	18	1.5177	0.0275	1.6739	0.0417
	20	1.58865	0.0115	1.73575	0.0115
	22	1.6697	0.0173	1.7798	0.0115
	24	1.72105	0.0115	1.8566	0.0173
750 μM CuCl2
	Time point (h)	Mean growth of pET 32a cells (OD600)	SE	Mean growth of pET 32a-ScGlo I-expressing cells (OD600)	SE
	0	0.0428	0.0075	0.0429	0.0086
	2	0.0559	0.0084	0.0679	0.0097
	4	0.0931	0.0123	0.1243	0.0142
	6	0.2019	0.0574	0.3425	0.0482
	8	0.6524	0.0424	0.7728	0.0573
	10	0.9228	0.0425	1.1578	0.0555
	12	1.1424	0.0627	1.3245	0.0734
	14	1.2885	0.0328	1.4276	0.0843
	16	1.3782	0.0724	1.5524	0.0773
	18	1.527	0.0738	1.6178	0.0913
	20	1.5965	0.0923	1.6923	0.1102
	22	1.6797	0.0786	1.7584	0.0734
	24	1.7415	0.0826	1.8345	0.0682
	26	1.8234	0.0827	1.9136	0.0986
	28	1.8927	0.0973	1.9971	0.0867
750 μM CdCl2
	Time point (h)	Mean growth of pET 32a cells (OD600)	SE	Mean growth of pET 32a-ScGlo I-expressing cells (OD600)	SE
	0	0.0442	0.0028	0.0459	0.0038
	2	0.0552	0.0045	0.0984	0.0064
	4	0.0942	0.0098	0.1284	0.0172
	6	0.1997	0.0285	0.4238	0.0321
	8	0.6424	0.0487	1.0128	0.0457
	10	0.9342	0.0384	1.2453	0.0384
	12	1.1245	0.0689	1.4359	0.0846
	14	1.2678	0.0742	1.5973	0.0643
	16	1.382	0.0398	1.7723	0.0658
	18	1.5428	0.0506	1.8213	0.0728
	20	1.6072	0.0841	1.8979	0.0911
	22	1.7425	0.0928	1.9328	0.0831
	24	1.8028	0.0468	1.9672	0.0642
	26	1.8688	0.0673	2.0123	0.0587
750 μM ZnSO4
	Time point (h)	Mean growth of pET 32a cells (OD600)	SE	Mean growth of pET 32a-ScGlo I-expressing cells (OD600)	SE
	0	0.0422	0.0023	0.0459	0.0002
	2	0.05925	0.002	0.10475	0.0016
	4	0.09965	0.0026	0.2964	0.0149
	6	0.2411	0.0079	0.7608	0.036
	8	0.6617	0.0067	1.14185	0.0487
	10	1.0384	0.0233	1.35465	0.064
	12	1.20725	0.0267	1.55315	0.0386
	14	1.394	0.0372	1.6952	0.0681
	16	1.48415	0.0331	1.77625	0.0652
	18	1.6085	0.0501	1.8486	0.058
	20	1.6829	0.0377	1.93975	0.0764
	22	1.8202	0.0615	1.96915	0.0746
	24	1.8095	0.0497	2.00025	0.0615
	26	1.8605	0.0246	2.05785	0.0571
	28	1.92565	0.0337	2.0839	0.0513
Notes: Each value represents the average of three biological repeats ± SE (n = 3).

## Sheet: Raw data for figure 5A
Fig. 5A. Expression of SoGloI gene in field collected sugarcane tissues.
	Mean Ct of SoGloI	Mean Ct of GAPDH	△Ct=(SoGloI-GAPDH)	△△Ct	2- △△Ct	SE
stems	24.708	22.318	2.39	0	1	0.0765
leaf sheats	24.4283	22.2132	2.2151	-0.1749	1.12889	0.1436
roots	24.8306	22.8446	1.986	-0.404	1.32317	0.1608
leaves	24.218	22.4645	1.7535	-0.6365	1.55455	0.1608
buds	23.3677	22.1188	1.2489	-1.1411	2.20549	0.1794
Notes：	Data were normalized to the GAPDH gene expression level.
	Each value represents the average of three biological repeats ± SE (n = 3).

## Sheet: Raw data for figure 5B,5C
Fig. 5B, 5C. Expression patterns of SoGloI gene in sugarcane grown in greenhouse under NaCl, CuCl2, CdCl2, ZnSO4, SA, MeJA, or ABA stresses.
NaCl	Mean Ct of SoGloI	Mean Ct of 25S rRNA	△Ct=(SoGloI-25S rRNA)	△△Ct	2- △△Ct	SE
0 h (Control)	22.428	12.783	9.645	0	1	0.079
12 h	21.7145	12.8546	8.8599	-0.7851	1.72321	0.1432
24 h	21.2195	12.9332	8.2863	-1.3587	2.56454	0.1748
48 h	21.1224	13.1141	8.0083	-1.6367	3.10954	0.1572
CuCl2	Mean Ct of SoGloI	Mean Ct of 25S rRNA	△Ct=(SoGloI-25S rRNA)	△△Ct	2- △△Ct	SE
0 h (Control)	22.428	12.783	9.645	0	1	0.079
12 h	22.2199	13.4737	8.7462	-0.8988	1.86451	0.1535
24 h	21.4524	12.9798	8.4726	-1.1724	2.25386	0.1712
48 h	21.1036	12.9932	8.1104	-1.5346	2.89708	0.2061
CdCl2	Mean Ct of SoGloI	Mean Ct of 25S rRNA	△Ct=(SoGloI-25S rRNA)	△△Ct	2- △△Ct	SE
0 h (Control)	22.428	12.783	9.645	0	1	0.079
12 h	22.0322	13.285	8.7472	-0.8978	1.86322	0.1374
24 h	21.4568	13.0374	8.4194	-1.2256	2.33853	0.1472
48 h	21.4234	13.278	8.1454	-1.4996	2.82764	0.1779
ZnSO4	Mean Ct of SoGloI	Mean Ct of 25S rRNA	△Ct=(SoGloI-25S rRNA)	△△Ct	2- △△Ct	SE
0 h (Control)	22.428	12.783	9.645	0	1	0.079
6 h	21.7136	12.68	9.03354	-0.611456	1.5278	0.2112
12 h	21.8241	12.9679	8.85623	-0.788769	1.7276	0.1945
24 h	21.9236	13.2237	8.69984	-0.945158	1.9254	0.2312
SA	Mean Ct of SoGloI	Mean Ct of 25S rRNA	△Ct=(SoGloI-25S rRNA)	△△Ct	2- △△Ct	SE
0 h (Control)	22.428	12.783	9.645	0	1	0.079
6 h	21.1231	12.8742	8.2489	-1.3961	2.63189	0.216
12 h	21.938	12.9787	8.9593	-0.6857	1.60848	0.1572
24 h	21.8111	12.9799	8.8312	-0.8138	1.75784	0.202
MeJA	Mean Ct of SoGloI	Mean Ct of 25S rRNA	△Ct=(SoGloI-25S rRNA)	△△Ct	2- △△Ct	SE
0 h (Control)	22.428	12.783	9.645	0	1	0.079
6 h	21.4397	12.8526	8.5871	-1.0579	2.0819	0.1275
12 h	21.5363	12.8393	8.697	-0.948	1.9292	0.1589
24 h	22.4182	13.6904	8.7278	-0.9172	1.88845	0.1712
ABA	Mean Ct of SoGloI	Mean Ct of 25S rRNA	△Ct=(SoGloI-25S rRNA)	△△Ct	2- △△Ct	SE
0 h (Control)	22.428	12.783	9.645	0	1	0.079
6 h	22.7055	13.5352	9.1703	-0.4747	1.38963	0.151
12 h	21.2747	12.9014	8.3733	-1.2717	2.41446	0.1572
24 h	22.4892	13.2856	9.2036	-0.4414	1.35792	0.1638
Notes:	All data were normalized to the 25S rRNA expression level.
	Each value is the average of three biological repeats ± SE (n = 3).

## Sheet: Raw data for figure 5D
SoGloI activity under 250 mM NaCl, 750 μM CuCl2, 750 μM CdCl2 or 750 μM ZnSO4 stresses.
Control	SoGloI activity (U/mg protein)	SE
0 h	0.137718	0.00819
12 h	0.14283	0.01037
24 h	0.14864	0.01123
48 h	0.15612	0.00912
250 mM Nacl	SoGloI activity (U/mg protein)	SE
0 h	0.137718	0.00819
12 h	0.248199	0.01608
24 h	0.305422	0.01611
48 h	0.322962	0.01436
750 μM CuCl2	SoGloI activity (U/mg protein)	SE
0 h	0.137718	0.00819
12 h	0.27218	0.01328
24 h	0.37259	0.02015
48 h	0.41275	0.01794
750 μM CdCl2	SoGloI activity (U/mg protein)	SE
0 h	0.137718	0.00819
12 h	0.28334	0.01473
24 h	0.426982	0.01451
48 h	0.573047	0.01844
750 μM ZnSO4	SoGloI activity (U/mg protein)	SE
0 h	0.137718	0.0819
12 h	0.18274	0.01723
24 h	0.21584	0.01923
48 h	0.28831	0.01247
Note: Each value is the average of three biological repeats ± SE (n = 3).
